# Supplementary material for: Light-intensity dependence of visible-light CO2 reduction over Ru(ii)-complex/Ag/polymeric carbon nitride hybrid photocatalysts
Source: Royal Society of Chemistry journal article supplement (doi:10.1039/d4se01488j), 2024-12-02
Supplement: d4se01488j1.pdf [file d4se01488j1.pdf]

*Electronic Supplementary Information (ESI)*

# Light-intensity dependence of visible-light CO<sub>2</sub> reduction over Ru(II)-complex/Ag/polymeric carbon nitride hybrid photocatalysts

*Ryuichi Nakada,<sup>1</sup> Chao Zhang,<sup>2</sup> Jo Onodera,<sup>1</sup> Toshiya Tanaka,<sup>1</sup> Megumi Okazaki,<sup>1</sup> Guigang Zhang,<sup>2\*</sup> Kazuhiko Maeda,<sup>1,3\*</sup>*

<sup>1</sup> Department of Chemistry, School of Science, Institute of Science Tokyo, 2-12-1-NE-2 Ookayama, Meguro-ku, Tokyo 152-8550, Japan.

<sup>2</sup> State Key Laboratory of Photocatalysis on Energy and Environment, College of Chemistry, Fuzhou University, Fuzhou 350108, P. R. China.

<sup>3</sup> Research Center for Autonomous Systems Materialogy (ASMat), Institute of Science Tokyo, 4259 Nagatsuta-cho, Midori-ku, Yokohama, Kanagawa 226-8501, Japan.

\*To whom corresponding author should be addressed.

G.Z.; [guigang.zhang@fzu.edu.cn](mailto:guigang.zhang@fzu.edu.cn); K.M.: [maeda@chem.sci.isct.ac.jp](mailto:maeda@chem.sci.isct.ac.jp)

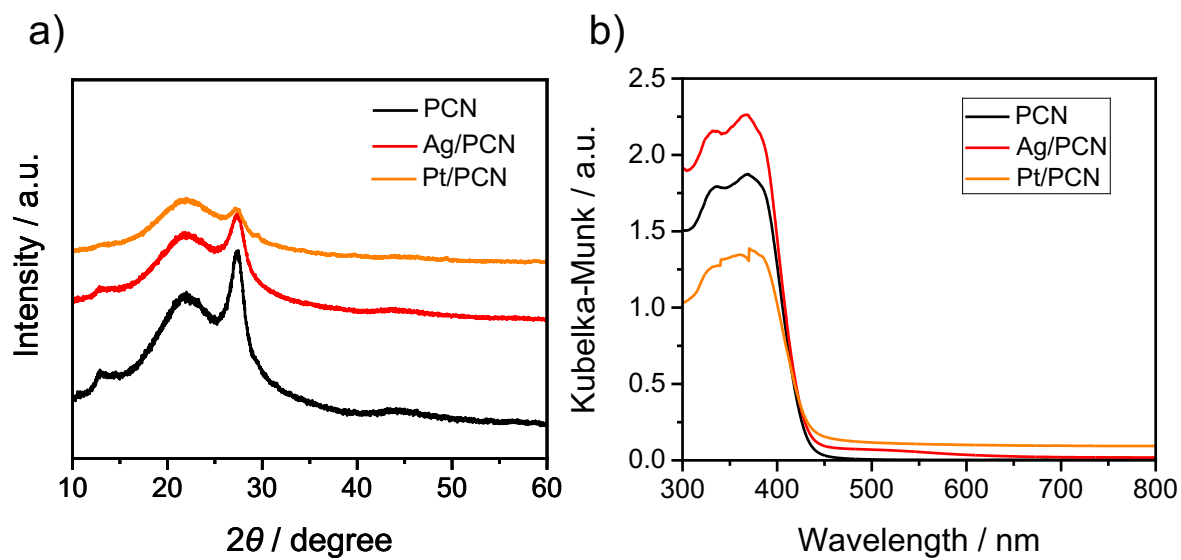

**Fig. S1.** a) XRD patterns and b) UV-visible diffuse-reflectance spectra for as-prepared PCN, Ag/PCN, and Pt/PCN.

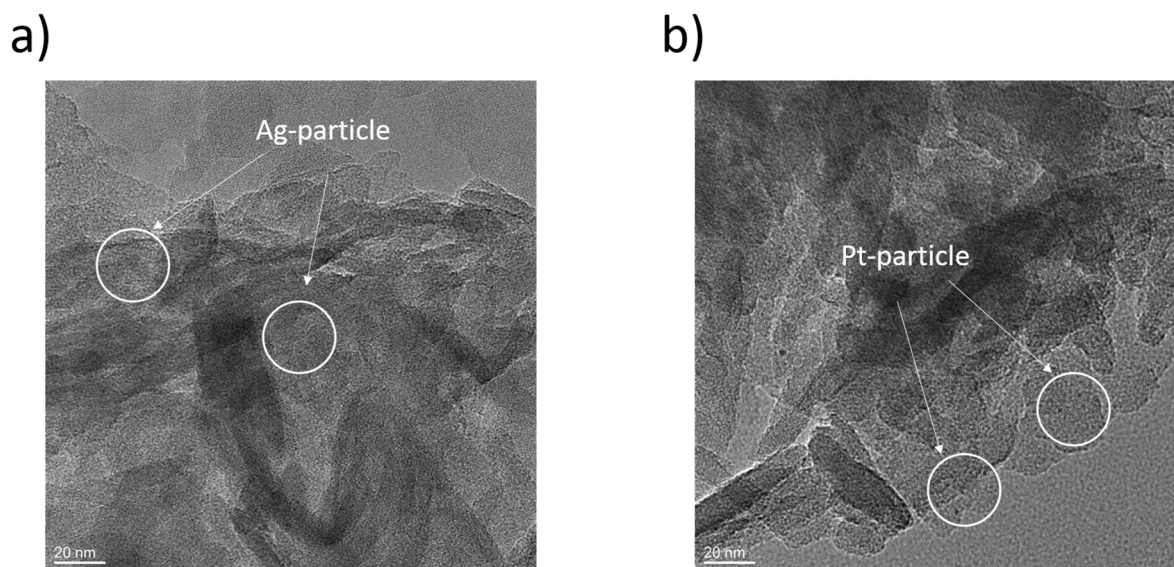

**Fig. S2.** TEM images of Ag/PCN and Pt/PCN.

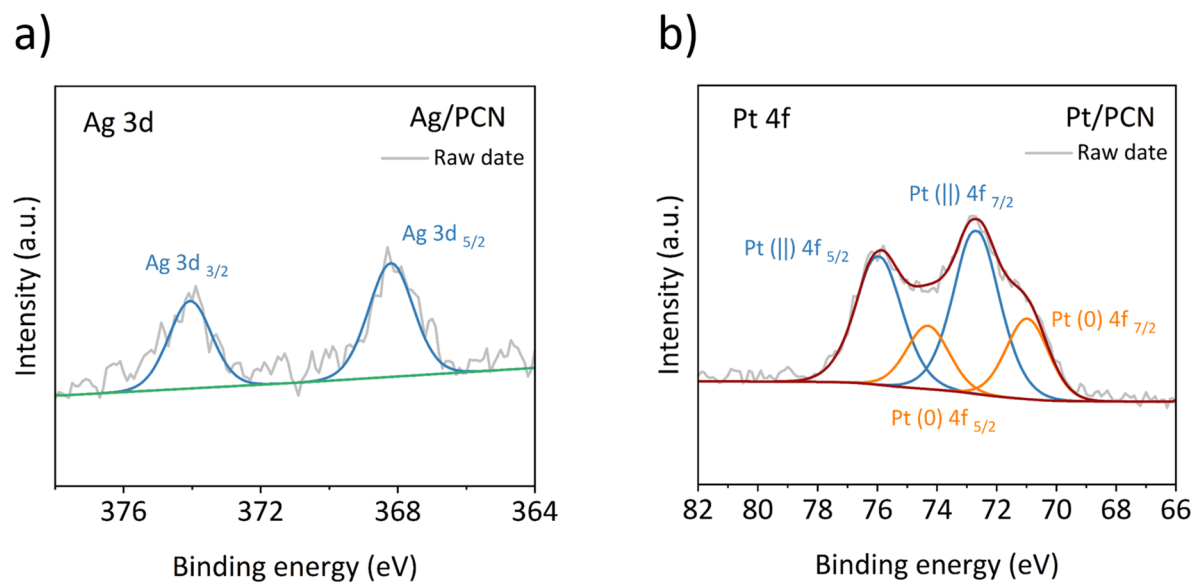

Fig. S3. Ag 3d and Pt 4f XPS spectra of Ag/PCN and Pt/PCN.

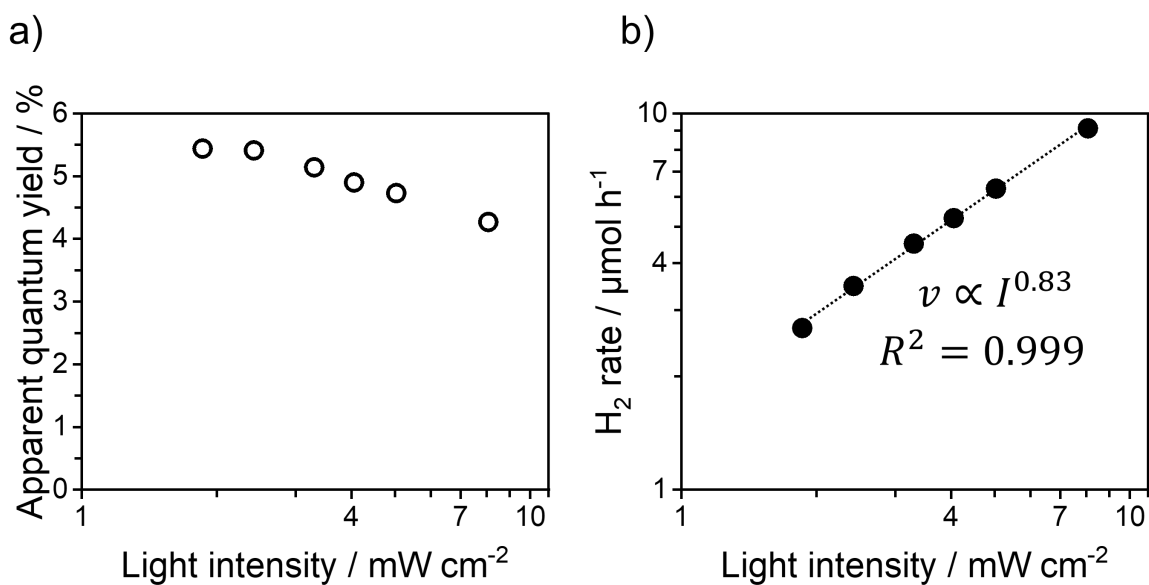

Fig. S4. a) Apparent quantum yield and b) H<sub>2</sub> evolution rate for Pt/PCN as function of incident-light intensity. Reaction conditions: catalyst, 14 mg; reactant solution, DMA:TEOA mixture solvent (4:1 v/v, 14 mL); wavelength of light, 400 nm, Pt: 2.0 wt%.

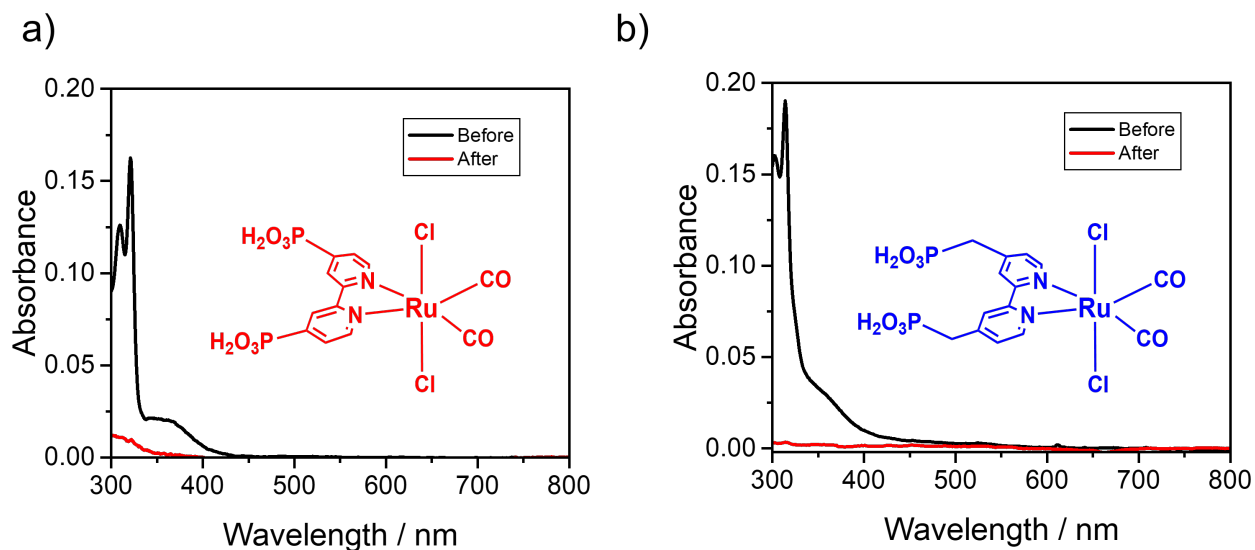

Fig. S5. UV-vis spectra of Ru metal complex in MeOH before and after adsorption: a) RuP and b) RuCP.

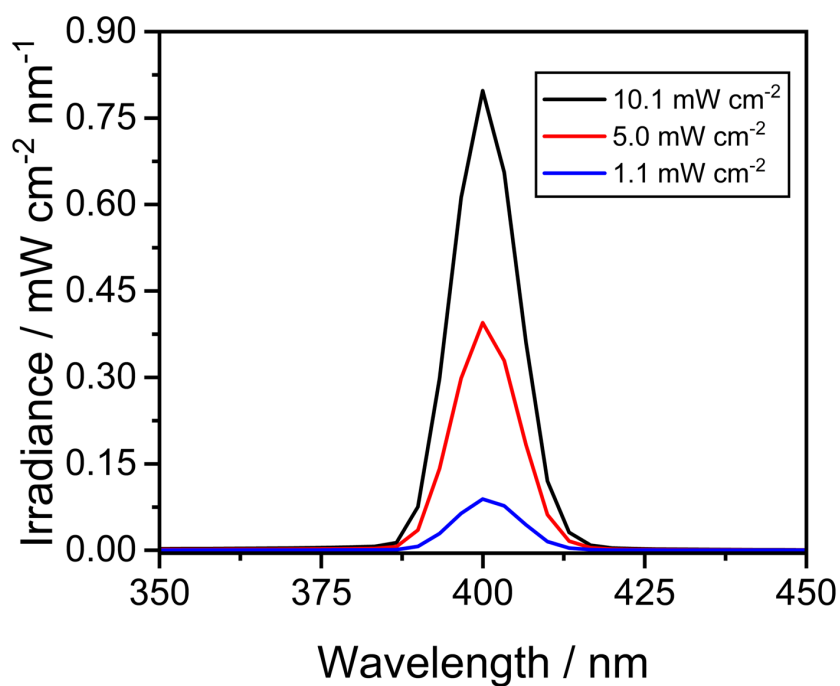

Fig. S6. Spectral irradiance of the monochromatized visible light at 400 nm with different intensities.

**Table S1.** Numerical data shown in Fig. 1 (**RuP/Ag/PCN**)

| Light intensity / mW cm <sup>-2</sup> | HCOOH rate / μmol h <sup>-1</sup> | HCOOH AQY / % | HCOOH selectivity / % | TON <sub>HCOOH</sub> | H <sub>2</sub> rate / μmol h <sup>-1</sup> | CO rate / μmol h <sup>-1</sup> |
|---------------------------------------|-----------------------------------|---------------|-----------------------|----------------------|--------------------------------------------|--------------------------------|
| 1.1                                   | 0.71                              | 2.43          | 91                    | 51                   | 0.14                                       | n.d.                           |
| 1.1                                   | 0.75                              | 2.45          | 95.5                  | 54                   | 0.07                                       | n.d.                           |
| 2.1                                   | 1.34                              | 2.44          | 95.3                  | 96                   | 0.13                                       | n.d.                           |
| 4.1                                   | 2.56                              | 2.36          | 95.7                  | 183                  | 0.23                                       | n.d.                           |
| 5.0                                   | 3.11                              | 2.35          | 95.7                  | 222                  | 0.28                                       | n.d.                           |
| 6.6                                   | 3.22                              | 1.83          | 94.9                  | 230                  | 0.35                                       | n.d.                           |
| 8.5                                   | 3.43                              | 1.52          | 91.2                  | 245                  | 0.66                                       | n.d.                           |
| 8.6                                   | 3.14                              | 1.37          | 90.1                  | 224                  | 0.69                                       | n.d.                           |
| 10.0                                  | 3.18                              | 1.20          | 94.0                  | 227                  | 0.20                                       | n.d.                           |
| 10.1                                  | 3.12                              | 1.15          | 86.0                  | 223                  | 0.81                                       | 0.21                           |
| 10.2                                  | 4.40                              | 1.63          | 90.7                  | 314                  | 0.71                                       | 0.19                           |

**Table S2.** Results of data analysis for relationship between rate of HCOOH production ( $v_{\text{HCOOH}}$ ) under 400 nm monochromatized light and incident-light intensity ( $I$ )<sup>a</sup>

| <b>RuP/Ag/PCN</b>            |      |      |       | <b>RuCP/Ag/PCN</b>           |      |      |       |
|------------------------------|------|------|-------|------------------------------|------|------|-------|
| Region / mW cm <sup>-2</sup> | $a$  | $b$  | $R^2$ | Region / mW cm <sup>-2</sup> | $a$  | $b$  | $R^2$ |
| 1.1–5.0                      | 0.66 | 0.97 | 0.999 | 2.0–10.1                     | 0.76 | 0.72 | 0.998 |
| 1.1–6.6                      | 0.68 | 0.89 | 0.958 |                              |      |      |       |
| 5.0–10.2                     | 2.1  | 0.23 | 0.23  |                              |      |      |       |

<sup>a</sup> Reaction conditions: the same as described in the captions of Figs. 1 and 2. The relationship between  $v_{\text{HCOOH}}$  and  $I$  is analyzed on the basis of the equation  $v = aI^b$ .

**Table S3.** Numerical data shown in Fig. 2 (**RuCP/Ag/PCN**)

| Light intensity / mW cm <sup>-2</sup> | HCOOH rate / μmol h <sup>-1</sup> | HCOOH AQY / % | HCOOH selectivity / % | TON <sub>HCOOH</sub> | H <sub>2</sub> rate / μmol h <sup>-1</sup> |
|---------------------------------------|-----------------------------------|---------------|-----------------------|----------------------|--------------------------------------------|
| 2.0                                   | 1.21                              | 2.34          | 89.3                  | 86                   | 0.15                                       |
| 5.0                                   | 2.47                              | 1.87          | 94.4                  | 176                  | 0.15                                       |
| 8.5                                   | 3.44                              | 1.53          | 90.1                  | 244                  | 0.38                                       |
| 10.1                                  | 4.01                              | 1.49          | 92.6                  | 286                  | 0.32                                       |

## References

1. R. Kuriki, H. Matsunaga, T. Nakashima, K. Wada, A. Yamakata, O. Ishitani and K. Maeda, *J. Am. Chem. Soc.*, 2016, **138**, 5159-5170.
2. M. Shizuno, K. Kato, S. Nishioka, T. Kanazawa, D. Saito, S. Nozawa, A. Yamakata, O. Ishitani and K. Maeda, *ACS Appl. Energy Mater.*, 2022, **5**, 9479-9486.
3. K. Maeda, D. An, C. S. Kumara Ranasinghe, T. Uchiyama, R. Kuriki, T. Kanazawa, D. Lu, S. Nozawa, A. Yamakata, Y. Uchimoto and O. Ishitani, *J. Mater. Chem. A*, 2018, **6**, 9708-9715.
4. P. A. Anderson, G. B. Deacon, K. H. Haarmann, F. R. Keene, T. J. Meyer, D. A. Reitsma, B. W. Skelton, G. F. Strouse and N. C. Thomas, *Inorg. Chem.*, 1995, **34**, 6145-6157.
